# Supplementary material for: In situ infrared CO detection using silver loaded EMT zeolite films
Source: Royal Society of Chemistry journal article supplement (doi:10.1039/d3na00238a), 2023-01-01
Supplement: d3na00238a1.pdf [file d3na00238a1.pdf]

## Supplementary Information for In Situ Infrared CO Detection Using Silver Loaded EMT Zeolite Films

Jiao Sun,<sup>\*a,c</sup> Yuda Wang,<sup>a</sup> Xinyao Zhang,<sup>a</sup> Mahmut Zulpya,<sup>a</sup> Xianhong Zheng,<sup>a</sup> Haitao He,<sup>a</sup> Lin

Xu <sup>\*b</sup> and Biao Dong<sup>b</sup>

<sup>a</sup>Department of cell biology, College of Basic Medical Science, Jilin University, China

<sup>b</sup>State Key Laboratory on Integrated Optoelectronics, College of Electronic Science and Engineering,

Jilin University

<sup>c</sup>The Key Laboratory of Pathobiology, Ministry of Education, College of Basic Medical Sciences,

Jilin University, Changchun 130021, Jilin Province, China.

\* To whom correspondence should be addressed: dongb@jlu.edu.cn.

Jiaosun@jlu.edu.cn

The PDF file includes:

Fig. S1 ,S2 and TOC

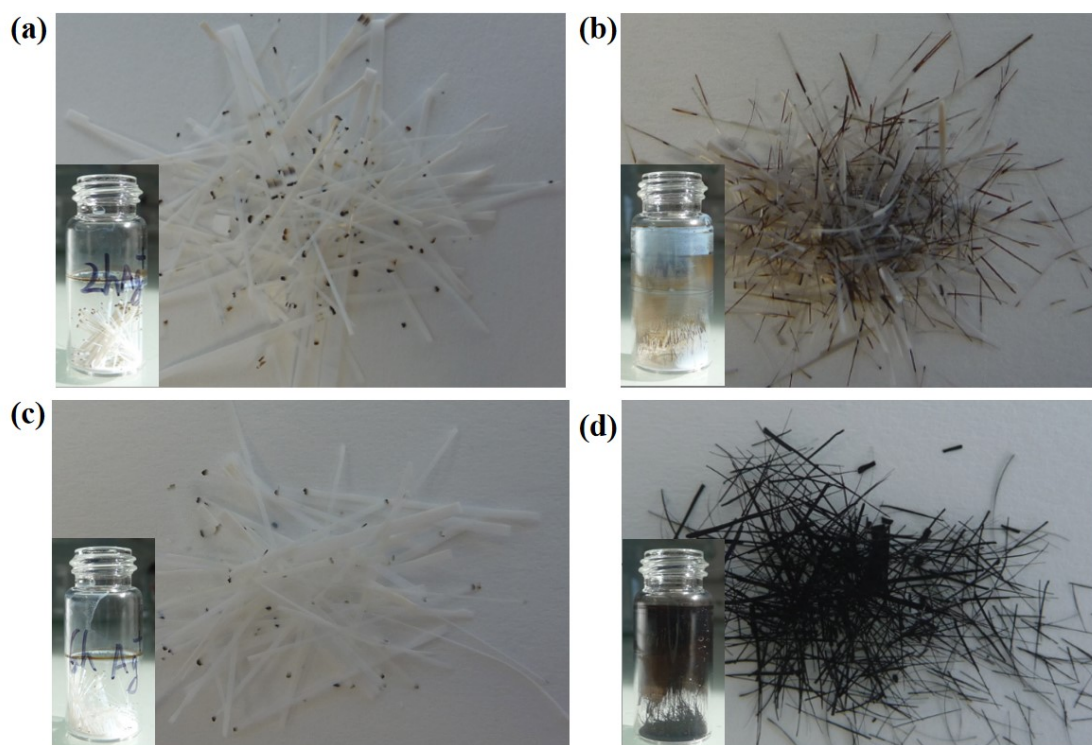

Fig. S1 After 2h and 6h ion exchange of the silver ions, EMT/Ag composite nanocrystals were reduced. To prove the great colloidal stability of the EMT/Ag composite nanocrystals, we put the colloidal solution (before and after reduction) into an oven, and then the zeolites became aligned wires during the water evaporation process, indicating that the zeolites nanocrystals have always been in a colloidal state and slowly aligned as wires with evaporation. For 2h and 6h ion exchanged EMT/Ag composite nanocrystals, the reduced samples(b)(d) are darker than that of unreduced samples(a)(c). Note that in unreduced wires, black dots can be seen at both ends of the wires which should attributed to reduced silver materials, because only silver ions at both ends of the wires can come into contact with air and be reduced when water evaporates.

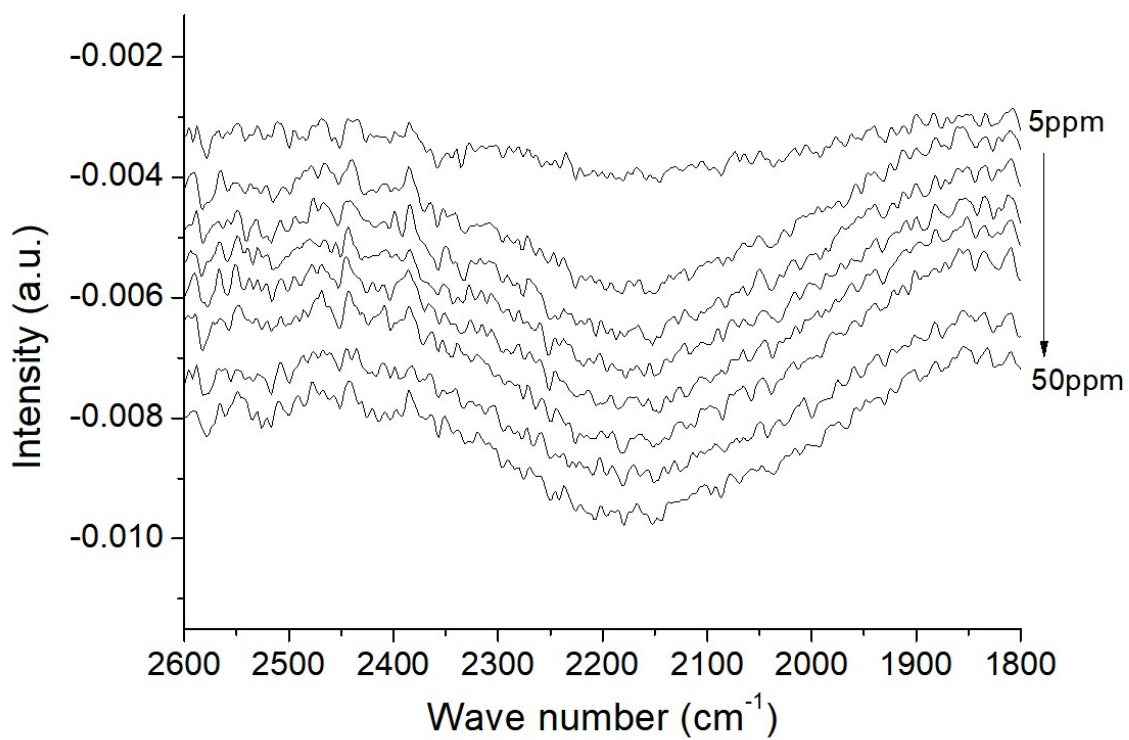

Fig. S2 No CO<sub>2</sub> signal was detected in a silver-EMT zeolite film without the Nalco binder
